# Supplementary material for: First Report of the Biosynthesis and Characterization of Silver Nanoparticles Using Scabiosa atropurpurea subsp. maritima Fruit Extracts and Their Antioxidant, Antimicrobial and Cytotoxic Properties
Source: MDPI journal article supplement (doi:10.3390/nano12091585), 2022-05-07
Supplement: s1 [file s1]

# First Report of the Biosynthesis and Characterization of Silver Nanoparticles Using *Scabiosa atropurpurea* subsp. *maritima* Fruit Extracts and Their Antioxidant, Antimicrobial and Cytotoxic Properties

Badiaa Essghaier <sup>1,\*</sup>, Nourchéne Toukabri <sup>2</sup>, Rihab Dridi <sup>3</sup>, Hédia Hannachi <sup>4</sup>, Inès Limam <sup>5</sup>, Filomena Mottola <sup>6</sup>, Mourad Mokni <sup>2</sup>, Mohamed Faouzi Zid <sup>3</sup>, Lucia Rocco <sup>6,\*</sup> and Mohamed Abdelkarim <sup>5</sup>

- <sup>1</sup> Department of Biology, Faculty of Sciences, University of Tunis El-Manar II, Tunis, 2092 Tunisia
  - <sup>2</sup> Unité de Mycologie, Laboratoire de Recherche Infections et Santé Publique LR18SP01, Service de Dermatologie et de Vénérologie, Hôpital La Rabta Jebbari, Tunis 1007, Tunisia; tnourchene@gmail.com (N.T.); mourad.mokni@rns.tn (M.M.)
  - <sup>3</sup> Laboratoire de Matériaux, Cristallographie et Thermodynamique Appliquée, Department of Chimie, Faculty of Sciences, University of Tunis El-Manar II, Tunis, 2092 Tunisia; rihab018@live.fr (R.D.); medfaouzi.zid57@gmail.com (M.F.Z.)
  - <sup>4</sup> Laboratory of Vegetable Productivity and Environmental Constraint LR18ES04, Department of Biology, Faculty of Science, University of Tunis El Manar II, Tunis, 2092 Tunisia; hedia.hannachi@fst.utm.tn
  - <sup>5</sup> Laboratory of Oncohematology, PRF of Oncohematology, Faculty of Medicine of Tunis, Tunis El Manar University, Tunis, 1006 Tunisia; limam.abdelkarim.ines@gmail.com (I.L.); mohamedabdelkarim2013@gmail.com (M.A.)
  - <sup>6</sup> Department of Environmental, Biological and Pharmaceutical Sciences and Technologies (DiSTABiF), University of Campania "L. Vanvitelli", Caserta, 81100 Italy; filomena.mottola@unicampania.it
- \*Correspondence: badiaaessghaier@gmail.com (B.E.); lucia.rocco@unicampania.it (L.R.)

**Citation:** Essghaier, B.; Toukabri, N.; Dridi, R.; Hannachi, H.; Limam, I.; Mottola, F.; Mokni, M.; Zid, M.F.; Rocco, L.; Abdelkarim, M. First Report of the Biosynthesis and Characterization of Silver Nanoparticles Using *Scabiosa atropurpurea* subsp. *maritima* Fruit Extracts and Their Antioxidant, Antimicrobial, and Cytotoxic Properties. *Nanomaterials* **2022**, *12*, x. <https://doi.org/10.3390/xxxxx>

Academic Editor(s): Heyou Han

Received: 31 March 2022

Accepted: 02 May 2022

Published: date

**Publisher's Note:** MDPI stays neutral with regard to jurisdictional claims in published maps and institutional affiliations.

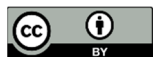

**Copyright:** © 2022 by the authors. Submitted for possible open access publication under the terms and conditions of the Creative Commons Attribution (CC BY) license (<https://creativecommons.org/licenses/by/4.0/>).

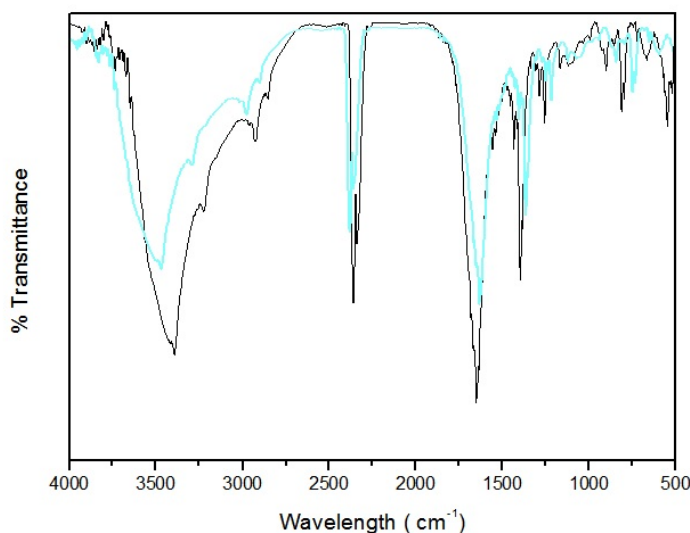

**Figure S1.** Plant extract (Blue) and synthesized AgNPs (Black)
